# Supplementary material
Source: MDPI journal article supplement (https://www.mdpi.com/2076-3417/10/11/3890)
Supplement: s1 [file s1]

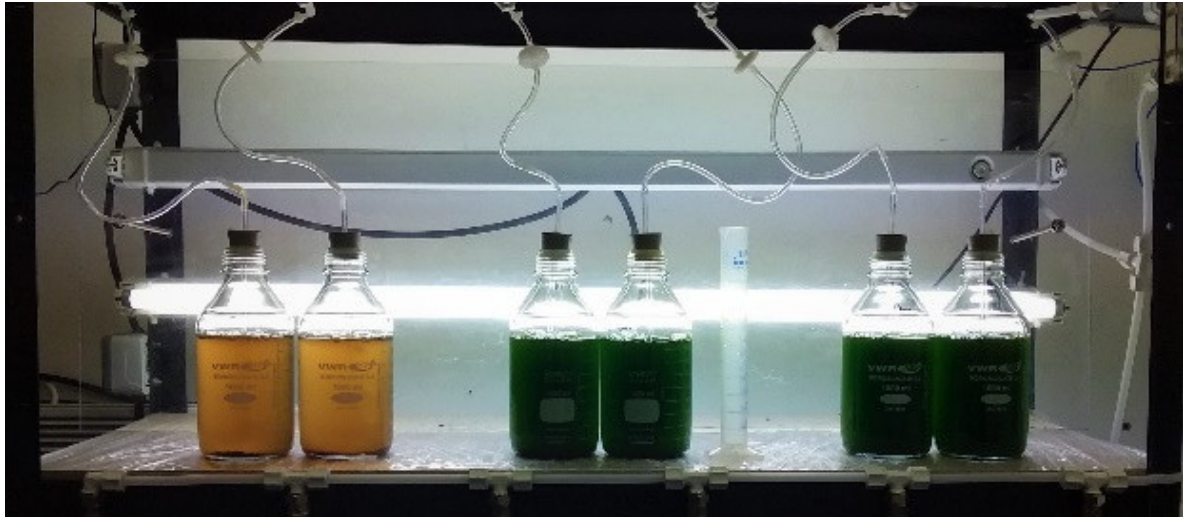

**Figure 1.** Cultivation of *Monoraphidium sp.* in batch at different concentrations, from left to right 1:20, 1:30, 1:50 respectively.

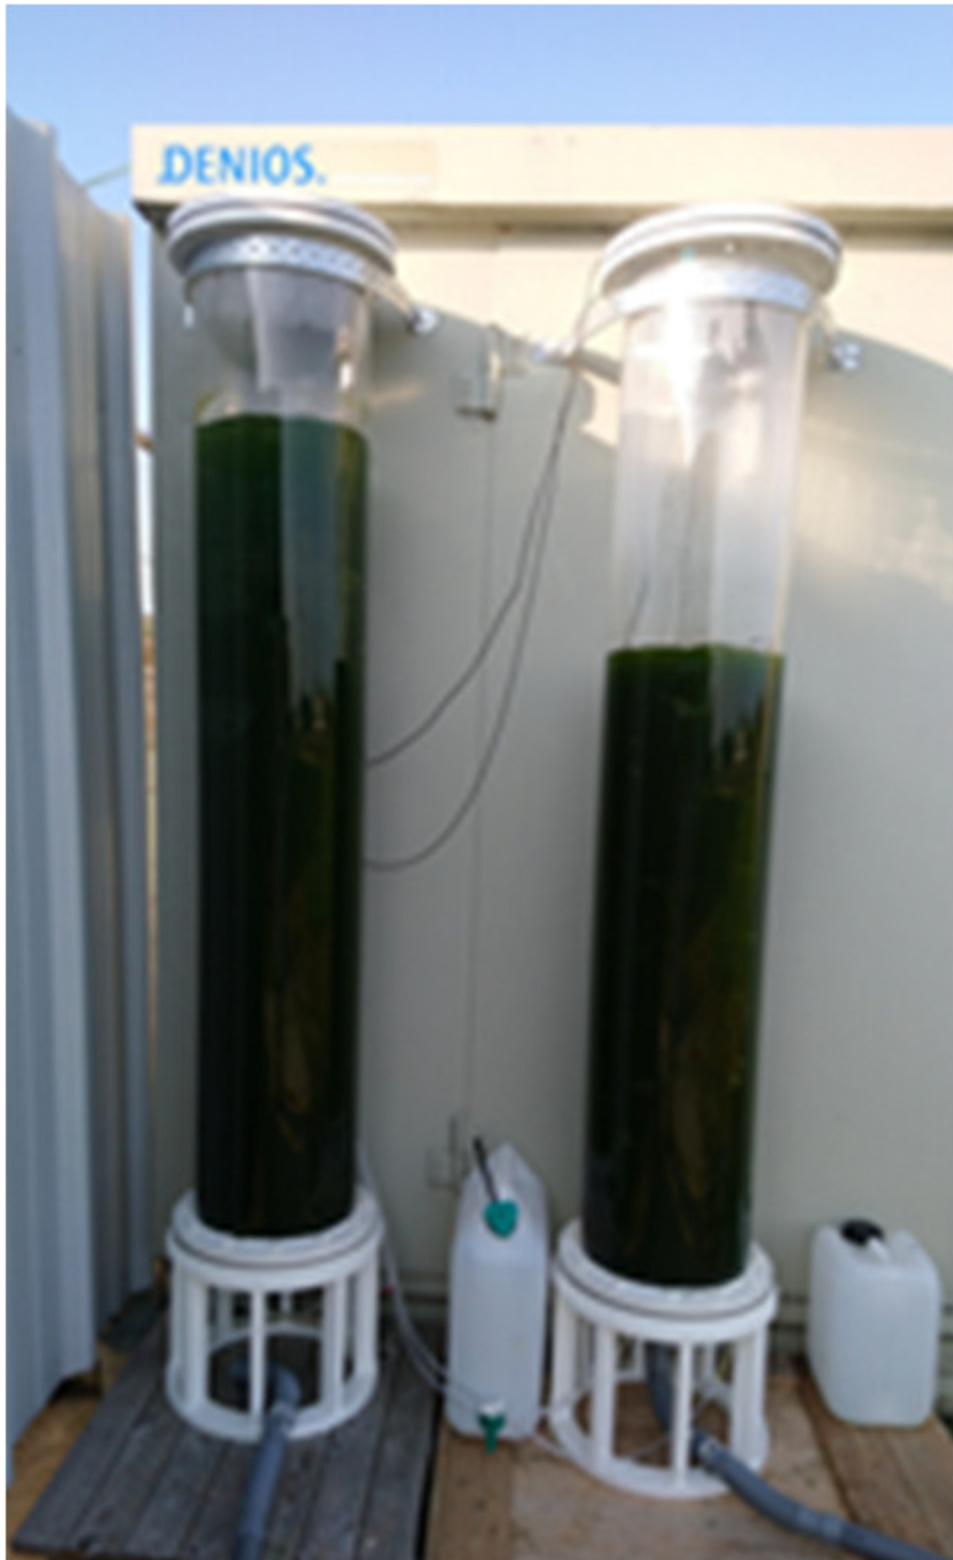

**Figure 2.** Cultivation of *Monoraphidium* sp. in photobioreactors of 110L in batch/ semi-continuous regimes with digestate diluted at 1:50.
